# Supplementary material for: The effects of trans-chalcone and chalcone 4 hydrate on the growth of Babesia and Theileria
Source: PubMed Central journal article supplement (PMC6534319; doi:10.1371/journal.pntd.0007030), 2019-05-24

Growth of *B. bovis*

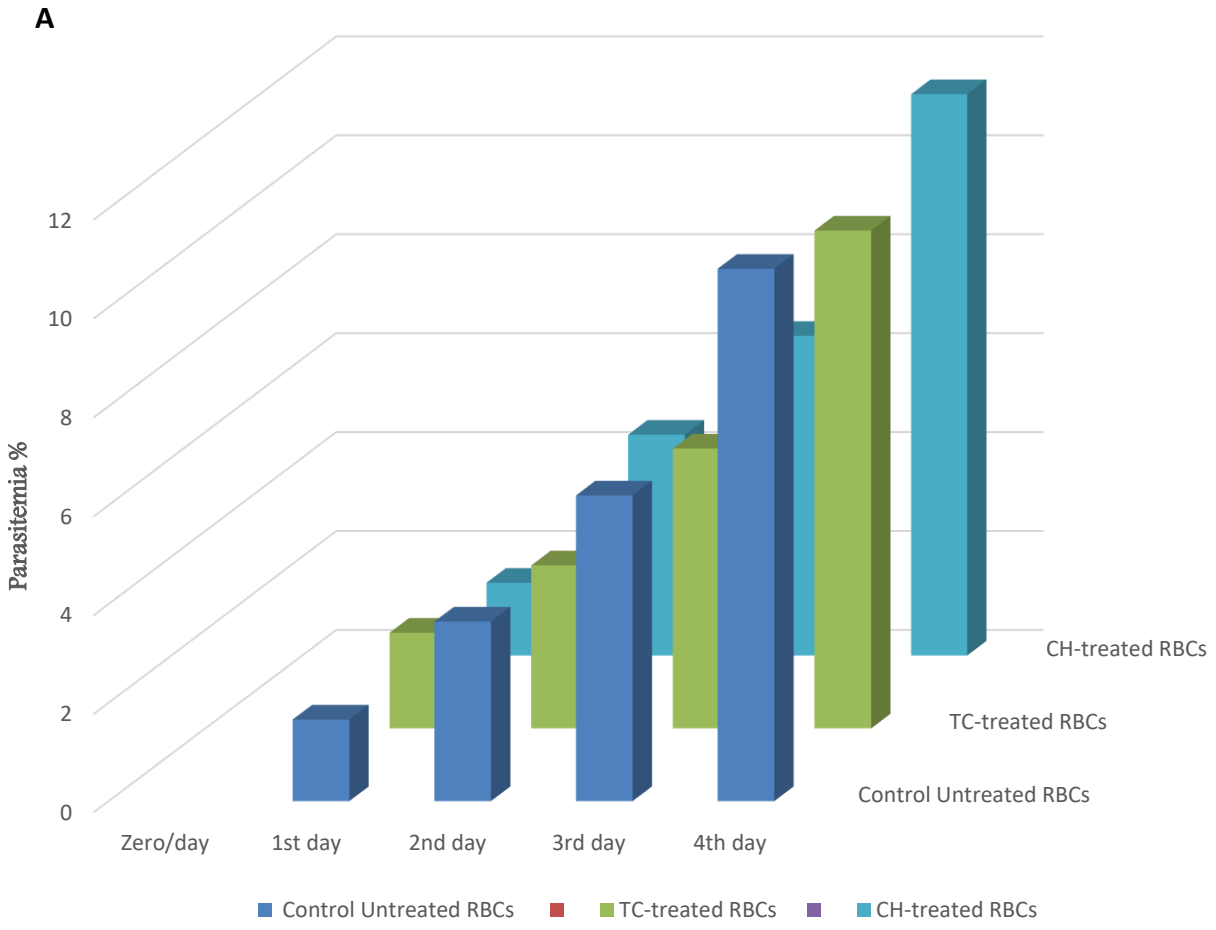

Growth of *T. equi*

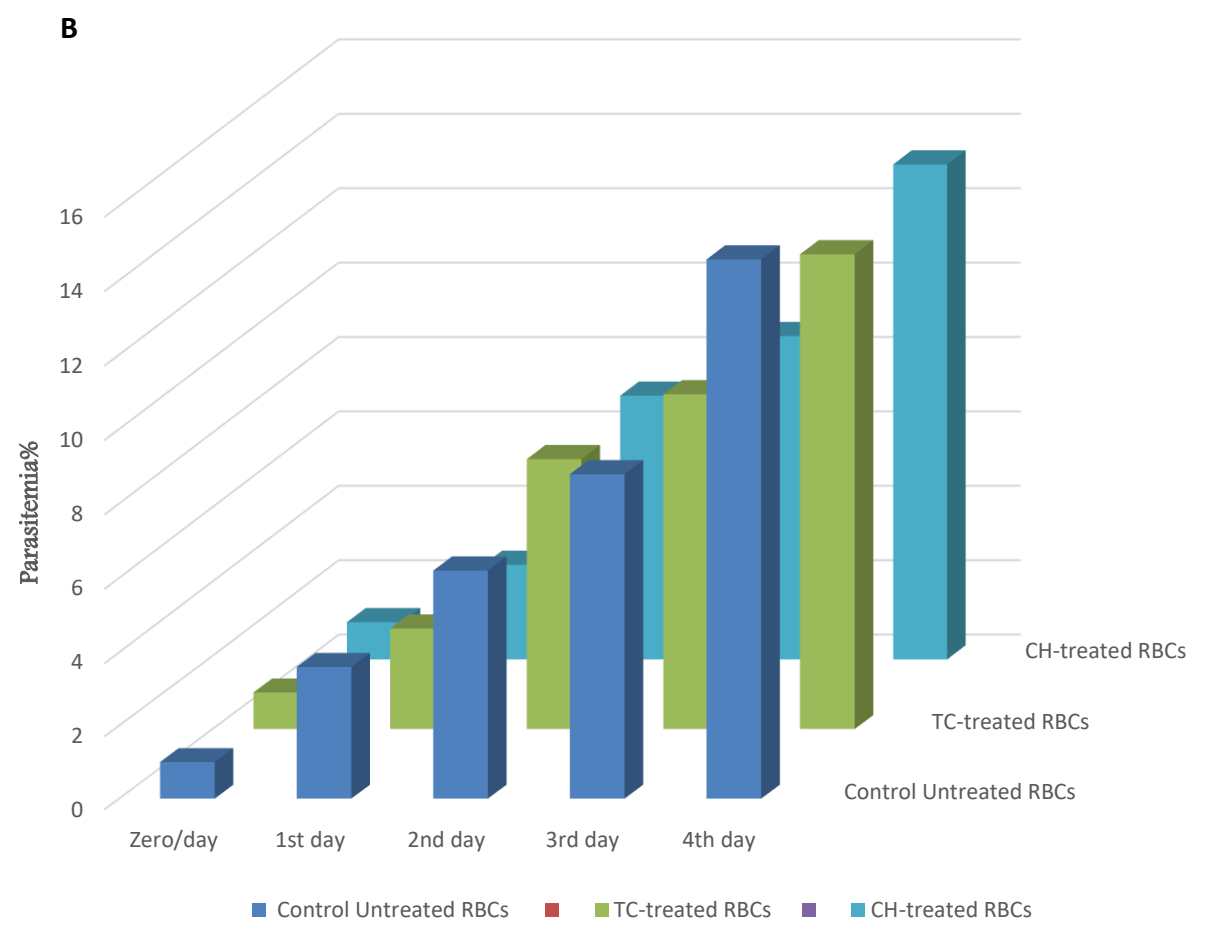

Supplement: pntd.0007030.s001.pdf [file pntd.0007030.s001.pdf]
